# Supplementary material for: Metabolomics Reveals the Effects of Nitrogen/Phosphorus/Potassium (NPK) Fertilizer Levels on Cucumber Fruit Raised in Different Nutrient Soils
Source: MDPI journal article supplement (doi:10.3390/metabo14020102), 2024-02-01
Supplement: s1 [file s1]

**Table S1.** Weekly fertilizer supply of different fertilizer levels

| <b>Weeks after transplanting</b> | <b>F0.5<br/>(N-P-K; kg ha<sup>-1</sup>)</b> | <b>F1<br/>(N-P-K; kg ha<sup>-1</sup>)</b> | <b>F2<br/>(N-P-K; kg ha<sup>-1</sup>)</b> |
|----------------------------------|---------------------------------------------|-------------------------------------------|-------------------------------------------|
| 3–4                              | 3-2-2                                       | 6-4-5                                     | 12-8-9                                    |
| 5–12                             | 6.5-5-5                                     | 13-9-11                                   | 26-18-21                                  |
| 13–21                            | 6-4-5                                       | 12-8-9                                    | 24-16-19                                  |
| <b>Total</b>                     | <b>82-57-65</b>                             | <b>164-114-131</b>                        | <b>328-228-262</b>                        |

**Table S2.** Cucumber yield and Partial Factor Productivity (PFP)

| <b>Low-nutrient soil</b> | <b>Fertilizer supply<br/>(kg ha<sup>-1</sup>)</b> | <b>Yield<sup>†</sup><br/>(kg ha<sup>-1</sup>)</b> | <b>PFP<sup>‡</sup><br/>(kg kg<sup>-1</sup>)</b> |
|--------------------------|---------------------------------------------------|---------------------------------------------------|-------------------------------------------------|
| F0                       | 0                                                 | 100,600                                           | -                                               |
| F0.5                     | 205                                               | 104,500                                           | 510                                             |
| F1                       | 409                                               | 98,100                                            | 240                                             |
| F2                       | 819                                               | 103,700                                           | 127                                             |

| <b>High-nutrient soil</b> | <b>Fertilizer supply<br/>(kg ha<sup>-1</sup>)</b> | <b>Yield<sup>†</sup><br/>(kg ha<sup>-1</sup>)</b> | <b>PFP<sup>‡</sup><br/>(kg kg<sup>-1</sup>)</b> |
|---------------------------|---------------------------------------------------|---------------------------------------------------|-------------------------------------------------|
| F0                        | 0                                                 | 119,000                                           | -                                               |
| F0.5                      | 205                                               | 122,000                                           | 596                                             |
| F1                        | 409                                               | 119,000                                           | 291                                             |
| F2                        | 819                                               | 122,000                                           | 149                                             |

<sup>†</sup>There was no statistical difference in the yield by the different fertilizer supply from F0.5 to F2 (ANOVA test, *p*-value > 0.05).

<sup>‡</sup>PFP (Partial Factor Productivity) = Yield/Fertilizer supply (N+P+K).
